# Supplementary material for: Delving into the catalytic mechanism of molybdenum cofactors: a novel coupled cluster study
Source: Royal Society of Chemistry journal article supplement (doi:10.1039/d4cp01500b), 2024-01-01
Supplement: d4cp01500b1.zip [file d4cp01500b1.zip]

## Sheet: Mo-Cys-DMSO
	FR Jorge DZ (DKH2)
		pCCD	fpLCCD	fpCCD	CCD	CCSD	DLPNO-CCSD	DLPNO-CCSD(T)	DLPNO-CCSD PCM	DLPNO-CCSD(T) PCM
	DMS	-478.088	-478.351	-478.357	-478.347	-478.349	-478.349	-478.362	-478.352	-478.366
	DMSO	-553.008	-553.398	-553.392	-553.392	-553.398	-553.397	-553.417	-553.409	-553.428
	1 Mo-Cys-DMSO	-6514.43	-6516.05	-6516.02	-6515.99	-6516.02	-6516.03	-6516.13	-6516.09	-6516.19
	2 TS1 Mo-Cys-DMSO	-7067.42	-7069.45	-7069.4	-7069.38	-7069.42	-7069.42	-7069.54	-7069.49	-7069.61
	3 IS Mo-Cys-DMSO	-7067.43	-7069.46	-7069.42	-7069.4	-7069.43	-7069.43	-7069.55	-7069.52	-7069.63
	4 TS2 Mo-Cys-DMSO	-7067.42	-7069.46	-7069.42	-7069.39	-7069.43	-7069.43	-7069.55	-7069.51	-7069.63
	5 Mo-Cys-O	-6589.47	-6591.24	-6591.2	-6591.17	-6591.2	-6591.2	-6591.31	-6591.27	-6591.38
											PR Jorge DZ (DKH2)
												pCCD	fpLCCD	fpCCD	CCD	CCSD	DLPNO-CCSD	DLPNO-CCSD(T)	DLPNO-CCSD PCM	DLPNO-CCSD(T) PCM
											DMS	-478.088	-478.351	-478.357	-478.347	-478.349	-478.349	-478.362	-478.352	-478.366
											DMSO	-553.008	-553.398	-553.392	-553.392	-553.398	-553.397	-553.417	-553.409	-553.428
											1 Mo-Cys-DMSO	-6514.37	-6516	-6515.97	-6515.94	-6515.97	-6515.97	-6516.07	-6516.04	-6516.14
											2 TS1 Mo-Cys-DMSO	-7067.36	-7069.4	-7069.36	-7069.33	-7069.37	-7069.37	-7069.49	-7069.45	-7069.57
											3 IS Mo-Cys-DMSO	-7067.38	-7069.42	-7069.37	-7069.35	-7069.39	-7069.39	-7069.51	-7069.48	-7069.6
											4 TS2 Mo-Cys-DMSO	-7067.37	-7069.41	-7069.37	-7069.34	-7069.38	-7069.38	-7069.5	-7069.47	-7069.59
											5 Mo-Cys-O	-6589.42	-6591.19	-6591.16	-6591.12	-6591.15	-6591.15	-6591.26	-6591.22	-6591.33

## Sheet: Mo-Cys-NO3
FR Jorge DZ (DKH2)
	pCCD	fpLCCD	fpCCD	CCD	CCSD	DLPNO-CCSD	DLPNO-CCSD(T)	DLPNO-CCSD PCM	DLPNO-CCSD(T) PCM
NO2	-204.423	-204.794	-204.788	-204.773	-204.782	-204.781	-204.8	-204.865	-204.883
NO3	-279.383	-279.894	-279.885	-279.869	-279.878	-279.878	-279.903	-279.956	-279.981
1 Mo-Cys-NO3	-6514.43	-6516.05	-6516.02	-6515.99	-6516.02	-6516.03	-6516.13	-6516.09	-6516.19
2 TS1 Mo-Cys-NO3	-6793.71	-6795.85	-6795.8	-6795.77	-6795.81	-6795.81	-6795.93	-6796.01	-6796.14
3 IS Mo-Cys-NO3	-6793.73	-6795.88	-6795.83	-6795.8	-6795.84	-6795.84	-6795.96	-6796.04	-6796.16
4 TS2 Mo-Cys-NO3	-6793.71	-6795.86	-6795.82	-6795.78	-6795.82	-6795.82	-6795.95	-6796.02	-6796.15
5 Mo-Cys-O	-6589.47	-6591.24	-6591.2	-6591.17	-6591.2	-6591.2	-6591.31	-6591.27	-6591.38
										PR Jorge DZ (DKH2)
											pCCD	fpLCCD	fpCCD	CCD	CCSD	DLPNO-CCSD	DLPNO-CCSD(T)	DLPNO-CCSD PCM	DLPNO-CCSD(T) PCM
										NO2	-204.423	-204.794	-204.788	-204.773	-204.782	-204.781	-204.8	-204.865	-204.883
										NO3	-279.383	-279.894	-279.885	-279.869	-279.878	-279.878	-279.903	-279.956	-279.981
										1 Mo-Cys-NO3	-6514.37	-6516	-6515.97	-6515.94	-6515.97	-6515.97	-6516.07	-6516.04	-6516.14
										2 TS1 Mo-Cys-NO3	-6793.66	-6795.81	-6795.77	-6795.73	-6795.77	-6795.77	-6795.9	-6795.98	-6796.1
										3 IS Mo-Cys-NO3	-6793.69	-6795.84	-6795.8	-6795.76	-6795.8	-6795.8	-6795.93	-6796	-6796.12
										4 TS2 Mo-Cys-NO3	-6793.67	-6795.83	-6795.79	-6795.74	-6795.79	-6795.79	-6795.92	-6795.99	-6796.12
										5 Mo-Cys-O	-6589.42	-6591.19	-6591.16	-6591.12	-6591.15	-6591.15	-6591.26	-6591.22	-6591.33
																				UR Jorge DZ (DKH2)
																					DLPNO-CCSD	DLPNO-CCSD(T)	DLPNO-CCSD PCM	DLPNO-CCSD(T) PCM
																				NO2	-204.781	-204.8	-204.865	-204.883
																				NO3	-279.878	-279.903	-279.956	-279.981
																				1 Mo-Cys-NO3	-6515.92	-6516.02	-6515.98	-6516.08
																				2 TS1 Mo-Cys-NO3	-6795.74	-6795.87	-6795.93	-6796.06
																				3 IS Mo-Cys-NO3	-6795.78	-6795.91	-6795.98	-6796.1
																				4 TS2 Mo-Cys-NO3	-6795.77	-6795.9	-6795.96	-6796.09
																				5 Mo-Cys-O	-6591.13	-6591.24	-6591.19	-6591.3

## Sheet: Mo-Asp-DMSO
	FR Jorge DZ (DKH2)
		pCCD	fpLCCD	fpCCD	CCD	CCSD	DLPNO-CCSD	DLPNO-CCSD(T)	DLPNO-CCSD PCM	DLPNO-CCSD(T) PCM
	DMS	-478.088	-478.351	-478.357	-478.347	-478.349	-478.349	-478.362	-478.352	-478.366
	DMSO	-553.008	-553.398	-553.392	-553.392	-553.398	-553.397	-553.417	-553.409	-553.428
	1 Mo-Asp-DMSO	-6303.73	-6305.58	-6305.54	-6305.51	-6305.54	-6305.54	-6305.65	-6305.61	-6305.71
	2 TS1 Mo-Asp-DMSO	-6856.72	-6858.97	-6858.93	-6858.89	-6858.93	-6858.93	-6859.06	-6859.01	-6859.14
	3 IS Mo-Asp-DMSO	-6856.72	-6858.99	-6858.94	-6858.91	-6858.95	-6858.95	-6859.08	-6859.03	-6859.16
	4 TS2 Mo-Asp-DMSO	-6856.72	-6858.98	-6858.94	-6858.9	-6858.95	-6858.95	-6859.08	-6859.03	-6859.16
	5 Mo-Cys-O	-6378.76	-6380.76	-6380.72	-6380.67	-6380.71	-6380.71	-6380.82	-6380.77	-6380.89
											PR Jorge DZ (DKH2)
												pCCD	fpLCCD	fpCCD	CCD	CCSD	DLPNO-CCSD	DLPNO-CCSD(T)	DLPNO-CCSD PCM	DLPNO-CCSD(T) PCM
											DMS	-478.088	-478.351	-478.357	-478.347	-478.349	-478.349	-478.362	-478.352	-478.366
											DMSO	-553.008	-553.398	-553.392	-553.392	-553.398	-553.397	-553.417	-553.409	-553.428
											1 Mo-Asp-DMSO	-6303.65	-6305.51	-6305.48	-6305.44	-6305.47	-6305.48	-6305.58	-6305.54	-6305.65
											2 TS1 Mo-Asp-DMSO	-6856.65	-6858.91	-6858.87	-6858.83	-6858.87	-6858.88	-6859	-6858.96	-6859.08
											3 IS Mo-Asp-DMSO	-6856.65	-6858.93	-6858.88	-6858.85	-6858.89	-6858.89	-6859.02	-6858.98	-6859.11
											4 TS2 Mo-Asp-DMSO	-6856.64	-6858.92	-6858.87	-6858.84	-6858.88	-6858.88	-6859.01	-6858.97	-6859.1
											5 Mo-Cys-O	-6378.7	-6380.7	-6380.66	-6380.61	-6380.65	-6380.65	-6380.77	-6380.72	-6380.84
																					Table 1-1
																						Partially relaxed + hydro		Partially relaxed + hydro
																					1.66		2.8	-6910.89
																					1.68	-6910.9	3	-6910.89
																					1.7	-6910.9	3.1	-6910.89
																					1.72	-6910.9	3.2	-6910.89
																					1.73	-6910.9	3.4	-6910.89
																					1.74	-6910.9
																					1.75	-6910.9
																					1.76	-6910.9
																					1.77	-6910.9
																					1.78	-6910.9
																					1.8	-6910.9
																					1.82	-6910.9
																									Table 1
																										Partially relaxed		Partially relaxed
																									1.66		2.8	-6910.89
																									1.68	-6910.89	2.9	-6910.89
																									1.7	-6910.89	2.95	-6910.89
																									1.71	-6910.89	3	-6910.89
																									1.72	-6910.89	3.1	-6910.89
																									1.73	-6910.89	3.2	-6910.89
																									1.74	-6910.89	3.4	-6910.89

## Sheet: Mo-Asp-NO3
FR Jorge DZ (DKH2)
						Relaxed
	pCCD	fpLCCD	fpCCD	CCD	CCSD	DLPNO-CCSD	DLPNO-CCSD(T)	DLPNO-CCSD PCM	DLPNO-CCSD(T) PCM
NO2	-204.423	-204.794	-204.788	-204.773	-204.782	-204.781	-204.8	-204.865	-204.883
NO3	-279.383	-279.894	-279.885	-279.869	-279.878	-279.878	-279.903	-279.956	-279.981
1 Mo-Asp-NO3	-6303.73	-6305.58	-6305.54	-6305.51	-6305.54	-6305.54	-6305.65	-6305.61	-6305.71
2 TS1 Mo-Asp-NO3	-6583.02	-6585.38	-6585.34	-6585.29	-6585.34	-6585.34	-6585.47	-6585.54	-6585.67
3 IS Mo-Asp-NO3	-6583.02	-6585.4	-6585.35	-6585.3	-6585.35	-6585.35	-6585.48	-6585.55	-6585.68
4 TS2 Mo-Asp-NO3	-6582.99	-6585.37	-6585.32	-6585.27	-6585.32	-6585.32	-6585.46	-6585.52	-6585.66
5 Mo-Asp-O	-6378.76	-6380.76	-6380.72	-6380.67	-6380.71	-6380.71	-6380.82	-6380.77	-6380.89
										PR Jorge DZ (DKH2)
											pCCD	fpLCCD	fpCCD	CCD	CCSD	DLPNO-CCSD	DLPNO-CCSD(T)	DLPNO-CCSD PCM	DLPNO-CCSD(T) PCM
										NO2	-204.423	-204.794	-204.788	-204.773	-204.782	-204.781	-204.8	-204.865	-204.883
										NO3	-279.383	-279.894	-279.885	-279.869	-279.878	-279.878	-279.903	-279.956	-279.981
										1 Mo-Asp-NO3	-6303.65	-6305.51	-6305.48	-6305.44	-6305.47	-6305.48	-6305.58	-6305.54	-6305.65
										2 TS1 Mo-Asp-NO3	-6582.95	-6585.33	-6585.28	-6585.23	-6585.28	-6585.28	-6585.42	-6585.48	-6585.62
										3 IS Mo-Asp-NO3	-6582.97	-6585.36	-6585.31	-6585.26	-6585.31	-6585.31	-6585.44	-6585.5	-6585.64
										4 TS2 Mo-Asp-NO3	-6582.94	-6585.34	-6585.29	-6585.24	-6585.29	-6585.29	-6585.43	-6585.49	-6585.62
										5 Mo-Asp-O	-6378.7	-6380.7	-6380.66	-6380.61	-6380.65	-6380.65	-6380.77	-6380.72	-6380.84

## Sheet: Mo-Ser-DMSO
	FR Jorge DZ (DKH2)
		pCCD	fpLCCD	fpCCD	CCD	CCSD	DLPNO-CCSD	DLPNO-CCSD(T)	DLPNO-CCSD PCM	DLPNO-CCSD(T) PCM
	DMS	-478.088	-478.351	-478.357	-478.347	-478.349	-478.349	-478.362	-478.352	-478.366
	DMSO	-553.008	-553.398	-553.392	-553.392	-553.398	-553.397	-553.417	-553.409	-553.428
	1 Mo-Ser-DMSO	-6190.79	-6192.42	-6192.39	-6192.36	-6192.39	-6192.39	-6192.48	-6192.46	-6192.55
	2 TS1 Mo-Ser-DMSO	-6743.77	-6745.82	-6745.78	-6745.75	-6745.78	-6745.79	-6745.9	-6745.86	-6745.98
	3 IS Mo-Ser-DMSO	-6743.77	-6745.83	-6745.78	-6745.76	-6745.8	-6745.8	-6745.91	-6745.88	-6745.99
	4 TS2 Mo-Ser-DMSO	-6743.77	-6745.82	-6745.78	-6745.75	-6745.79	-6745.79	-6745.91	-6745.88	-6745.99
	5 Mo-Ser-O	-6265.83	-6267.61	-6267.57	-6267.53	-6267.56	-6267.56	-6267.67	-6267.63	-6267.73

## Sheet: Mo-Ser-NO3
FR Jorge DZ (DKH2)
	pCCD	fpLCCD	fpCCD	CCD	CCSD	DLPNO-CCSD	DLPNO-CCSD(T)	DLPNO-CCSD PCM	DLPNO-CCSD(T) PCM
NO2	-204.423	-204.794	-204.788	-204.773	-204.782	-204.781	-204.8	-204.865	-204.883
NO3	-279.383	-279.894	-279.885	-279.869	-279.878	-279.878	-279.903	-279.956	-279.981
1 Mo-Ser-NO3	-6190.79	-6192.42	-6192.39	-6192.36	-6192.39	-6192.39	-6192.48	-6192.46	-6192.55
2 TS1 Mo-Ser-NO3	-6470.07	-6472.22	-6472.18	-6472.14	-6472.18	-6472.18	-6472.3	-6472.39	-6472.51
3 IS Mo-Ser-NO3	-6470.07	-6472.22	-6472.18	-6472.14	-6472.18	-6472.18	-6472.3	-6472.39	-6472.51
4 TS2 Mo-Ser-NO3	-6470.03	-6472.2	-6472.15	-6472.1	-6472.15	-6472.15	-6472.28	-6472.36	-6472.48
5 Mo-Ser-O	-6265.83	-6267.61	-6267.57	-6267.53	-6267.56	-6267.56	-6267.67	-6267.63	-6267.73

## Sheet: I_ij fully relaxed
Mo-Cys-NO3 Jorge DZ (DKH2) — fpLCCD
	2_ts1 (RDS)			3_is			4_ts2			5_Mo
orbital-pair	i	j	I_ij	i	j	I_ij	i	j	I_ij	i	j	I_ij
(d(M)-p)-(d(M)-p)*	100	172	0.0593489	98	167	0.0596737	97	163	0.0608494	82	150	0.0603144
(d(M)-p)-(d(M)-p)*	97	179	0.0580121	96	176	0.0568646	96	175	0.0568913	84	157	0.0544995
(d_z2-p)-(d_z2-p)*	76	174	0.0645663	74	174	0.0619977	71	180	0.0588849	68	147	0.0716666
σ(M-O)—σ*(M-O)	72	144	0.0950889	78	138	0.114643	79	138	0.117127	61	132	0.111459
σ(N-O)—σ*(N-O)	96	122	0.158171	111	120	0.180979	112	119	0.305698	-	-	-
π(NO3)—π*(NO3)	111	120	0.182472	113	116	0.309277	113	116	0.327359	-	-	-
π(NO3)—π*(NO3)	112	119	0.183518	91	116	0.0814896	98	116	0.0980592	-	-	-
π(Op)—π*(Op)	68	149	0.090035	70	150	0.0877089	76	146	0.0999687	99	108	0.245877
π(Op)—π*(Op)	63	165	0.0850272	61	165	0.0802012	61	173	0.0780764	101	106	0.357189
													Mo-Ser-NO3 Jorge DZ (DKH2) — fpLCCD-1
														2_ts1			3_is			4_ts2 (RDS)			5_Mo
													orbital-pair	i	j	I_ij	i	j	I_ij	i	j	I_ij	i	j	I_ij
													(d(M)-p)-(d(M)-p)*	74	142	0.101947	68	145	0.0943271	69	145	0.0960193	57	138	0.0904132
													(d(M)-p)-(d(M)-p)*	79	136	0.116487	78	137	0.116868	78	135	0.116785	69	121	0.119413
													(d_z2-p)-(d_z2-p)*	75	138	0.117486	76	135	0.120372	79	134	0.12215	71	119	0.132653
													σ(M-O)—σ*(M-O)	66	147	0.0920028	73	141	0.108981	73	141	0.111556	55	131	0.109235
													σ(N-O)—σ*(N-O)	94	118	0.158166	98	116	0.172643	108	115	0.321137	-	-
													π(NO3)—π*(NO3)	107	116	0.185077	109	114	0.302668	111	112	0.347282	-	-
													π(NO3)—π*(NO3)	108	115	0.187514	82	114	0.069434	93	112	0.0932325	-	-
													π(Op)—π*(Op)	64	148	0.0898703	61	162	0.0806946	66	154	0.0876071	95	104	0.283574
													π(Op)—π*(Op)	59	154	0.0877124	63	154	0.0846401	67	147	0.0903933	96	103	0.31611
																										Mo-Asp-NO3 Jorge DZ (DKH2) — fpLCCD
																											2_ts1 (RDS)			3_is			4_ts2
																										orbital-pair	i	j	I_ij	i	j	I_ij	i	j	I_ij
																										(d(M)-p)-(d(M)-p)*	78	151	0.0997932	70	159	0.0903621	78	153	0.099719
																										(d(M)-p)-(d(M)-p)*	80	149	0.105349	78	151	0.0989607	83	144	0.113316
																										(d_z2-p)-(d_z2-p)*	81	147	0.1151	80	146	0.113704	81	142	0.116093
																										σ(M-O)—σ*(M-O)	75	154	0.0926662	79	149	0.108708	79	149	0.111938
																										σ(N-O)—σ*(N-O)	100	126	0.158866	106	124	0.173379	115	122	0.323685
																										π(NO3)—π*(NO3)	113	124	0.183581	116	121	0.300375	118	119	0.340189
																										π(NO3)—π*(NO3)	114	123	0.192991	93	121	0.0747375	100	119	0.0968483
																										π(Op)—π*(Op)	61	169	0.0860323	59	174	0.0800872	67	168	0.0875537
																										π(Op)—π*(Op)	65	162	0.0899832	66	166	0.0851894	68	159	0.0908718
																																				Mo-Cys-DMSO Jorge DZ (DKH2) — fpLCCD
																																					2_ts1 (RDS)			3_is			4_ts2
																																				orbital-pair	i	j	I_ij	i	j	I_ij	i	j	I_ij
																																				(d(M)-p)-(d(M)-p)*	99	184	0.0573172	90	183	0.0567282	90	186	0.0560701
																																				(d(M)-p)-(d(M)-p)*	100	178	0.058842	96	180	0.0582895	99	174	0.0594077
																																				(d_z2-p)-(d_z2-p)*	73	182	0.063624	71	185	0.0597118	70	191	0.058115
																																				σ(M-O)—σ*(M-O)	70	156	0.0975314	77	153	0.108509	77	153	0.107872
																																				σ(S-O)—σ*(S-O)	85	142	0.137513	98	125	0.155347	117	124	0.224646
																																				π(Op)—π*(Op)	75	154	0.10654	74	158	0.100001	71	156	0.0955998
																																				π(Op)—π*(Op)	77	153	0.113991	75	156	0.101994	72	155	0.0955124
																																														Mo-Asp-DMSO Jorge DZ (DKH2) — fpLCCD
																																															2_ts1 (RDS)
																																														orbital-pair	i	j	I_ij
																																														(d(M)-p)-(d(M)-p)*	76	162	0.0996152
																																														(d(M)-p)-(d(M)-p)*	77	161	0.101782
																																														(d_z2-p)-(d_z2-p)*	78	159	0.109109
																																														σ(M-O)—σ*(M-O)	70	166	0.0961099
																																														σ(S-O)—σ*(S-O)	89	145	0.136891
																																														π(Op)—π*(Op)	79	160	0.109628
																																														π(Op)—π*(Op)	80	158	0.113537
[truncated: 6 more columns]

## Sheet: I_ij partially relaxed
Mo-Cys-NO3 Jorge DZ (DKH2) — fpLCCD
	2_ts1 (RDS)			3_is			4_ts2			5_Mo
orbital-pair	i	j	I_ij	i	j	I_ij	i	j	I_ij	i	j	I_ij
(d(M)-p)-(d(M)-p)*	98	171	0.0607321	98	172	0.0576519	97	182	0.0534385
(d(M)-p)-(d(M)-p)*	100	177	0.0570507	99	180	0.0540843	98	173	0.0577585
(d_z2-p)-(d_z2-p)*	73	178	0.0594991	77	171	0.0615326	76	171	0.0608873
σ(M-O)—σ*(M-O)	67	150	0.089824	80	139	0.112461	80	139	0.114331
σ(N-O)—σ*(N-O)	99	121	0.159641	111	120	0.1864	111	120	0.281909
π(NO3)—π*(NO3)	112	119	0.260459	114	116	0.311435	114	116	0.327462
π(NO3)—π*(NO3)	82	176	0.0778389	90	116	0.0826271	99	116	0.0978525
π(Op)—π*(Op)	68	155	0.0900636	66	158	0.0845753	74	146	0.0974754
π(Op)—π*(Op)	71	156	0.0860625	67	153	0.0853803	63	168	0.0798722
													Mo-Ser-NO3 Jorge DZ (DKH2) — fpLCCD-1
														2_ts1			3_is			4_ts2 (RDS)			5_Mo
													orbital-pair	i	j	I_ij	i	j	I_ij	i	j	I_ij	i	j	I_ij
													(d(M)-p)-(d(M)-p)*
													(d(M)-p)-(d(M)-p)*
													(d_z2-p)-(d_z2-p)*
													σ(M-O)—σ*(M-O)
													σ(N-O)—σ*(N-O)
													π(NO3)—π*(NO3)
													π(NO3)—π*(NO3)
													π(Op)—π*(Op)
													π(Op)—π*(Op)
